# Supplementary material for: Synthesis and Biodegradation Test of a New Polyether Polyurethane Foam Produced from PEG 400, L-Lysine Ethyl Ester Diisocyanate (L-LDI) and Bis-hydroxymethyl Furan (BHMF)
Source: MDPI journal article supplement (doi:10.3390/toxics11080698), 2023-08-13

## Electronic supplementary information

# Synthesis and biodegradation test of a new polyether polyurethane foam produced from PEG 400, L-Lysine ethyl ester diisocyanate (L-LDI) and bis-hydroxymethyl furan (BHMF)

Fabrizio Olivito <sup>1,\*</sup>, Pravin Jagdale <sup>2</sup> and Goldie Oza

<sup>1</sup> Department of Chemistry and Chemical Technologies,  
University of Calabria, Via P. Bucci, Cubo 12C, 87036 Rende,  
CS, Italy;

fabrizio.olivito@unical.it

<sup>2</sup> Circular carbon GMBH, Europaring 4, 94315 Straubing,  
Germany;

pravin.jagdale@circular-carbon.com

<sup>3</sup> Centro De Investigación Y Desarrollo Tecnológico En  
Electroquímica, Santiago de Querétaro, Mexico;  
goza@cideteq.mx

\* Correspondence: fabrizio.olivito@unical.it

## Table of Contents

|     |                                                                        |    |
|-----|------------------------------------------------------------------------|----|
| S1. | Reagents                                                               | S3 |
| S2. | Determination of the isocyanate content of the prepolymer              | S4 |
| S3. | FT-IR spectra of PEG 400 and L-Lysine ethyl ester diisocyanate (L-LDI) | S5 |
| S4. | GC-MS and HPLC of HMF                                                  | S7 |
| S5. | GC-MS and HPLC of BHMF                                                 | S8 |
| S6. | GC-MS and HPLC of BHMF after enzymatic hydrolysis                      | S9 |

## S1. Reagents

### **Polyethylene glycol PEG 400 ( Fisher Scientific)**

Molecular formula:  $(C_2H_4O)_n$

Appearance (Color): Clear colorless

Form: Viscous liquid

Identification (FTIR): Conforms

Molecular Weight: 62.07 (g/mol)

### **L-Lysine ethyl ester diisocyanate (Fisher scientific)**

Molecular formula:  $C_{10}H_{14}N_2O_4$

Appearance (Color): Clear colorless

Form: liquid

Identification (FTIR): Conforms

Molecular Weight: 226.232 g/mol

## S2. Determination of the Isocyanate content of the prepolymer

3-5 g of the prepolymer were dissolved in 50 ml of di-n-butylamine solution 0.2 N. 6 drops of bromophenol blue indicator were added. HCl 0.5 N was added until the colour of the solution turned to a yellow-green endpoint. The same procedure is carried out on the blank. The NCO % was calculated using the following formula:

$$\% NCO = \frac{4202 (N)(B - A)}{(sample\ weight)1000}$$

B = blank titer

A = sample titer

N = normality of the hydrochloric acid

\*The prepolymer produced using the optimized reaction condition, present a NCO % of 15%, in accordance with the conventionally percentage reported industrially.

### S3. FT-IR spectrum of PEG 400

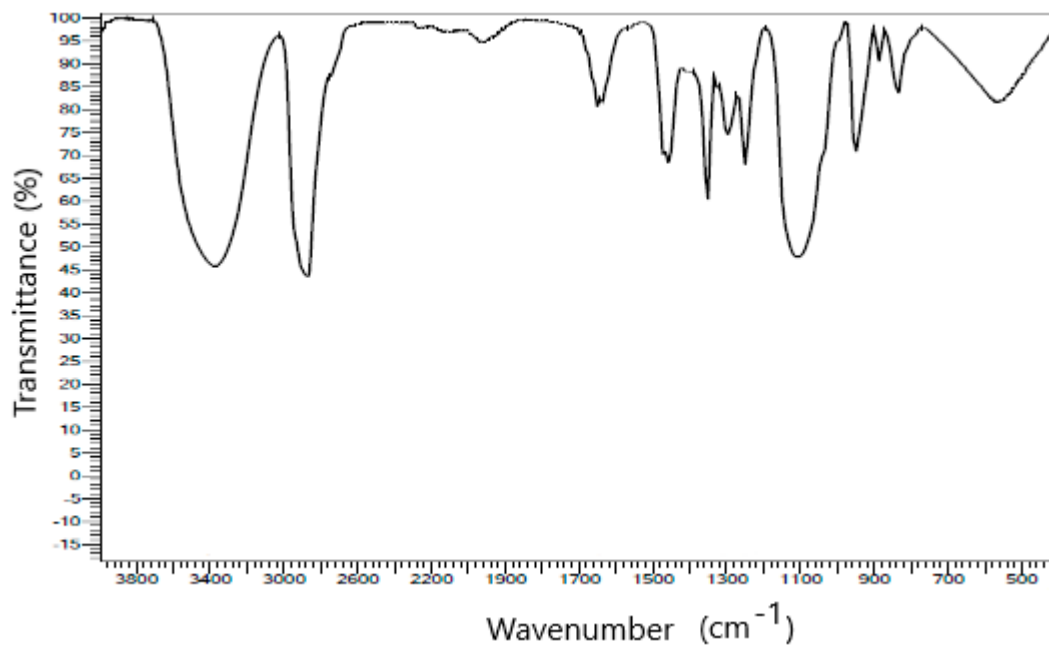

| Functional group | Absorption peak (cm <sup>-1</sup> ) |
|------------------|-------------------------------------|
| O-H              | 3379                                |
| Aliphatic C-H    | 2870                                |
| C-O-C and C-O-H  | 1103                                |
| Bending ethers   | 915-650                             |

### FT-IR spectrum of L-Lysine ethyl ester diisocyanate (L-LDI)

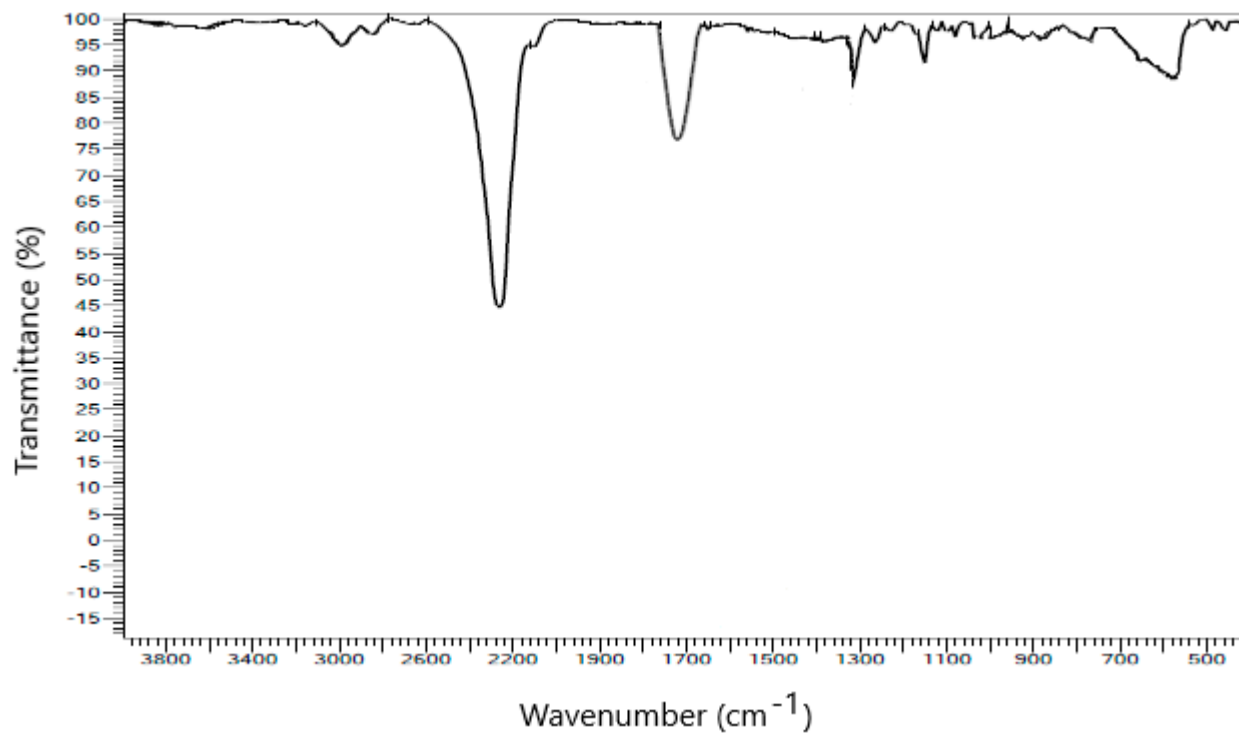

| Functional group | Absorption peak (cm <sup>-1</sup> ) |
|------------------|-------------------------------------|
| C-H stretching   | 2915                                |
| N=C=O stretching | 2240                                |
| C=O              | 1740                                |

**S4. GC-MS and HPLC of HMF**

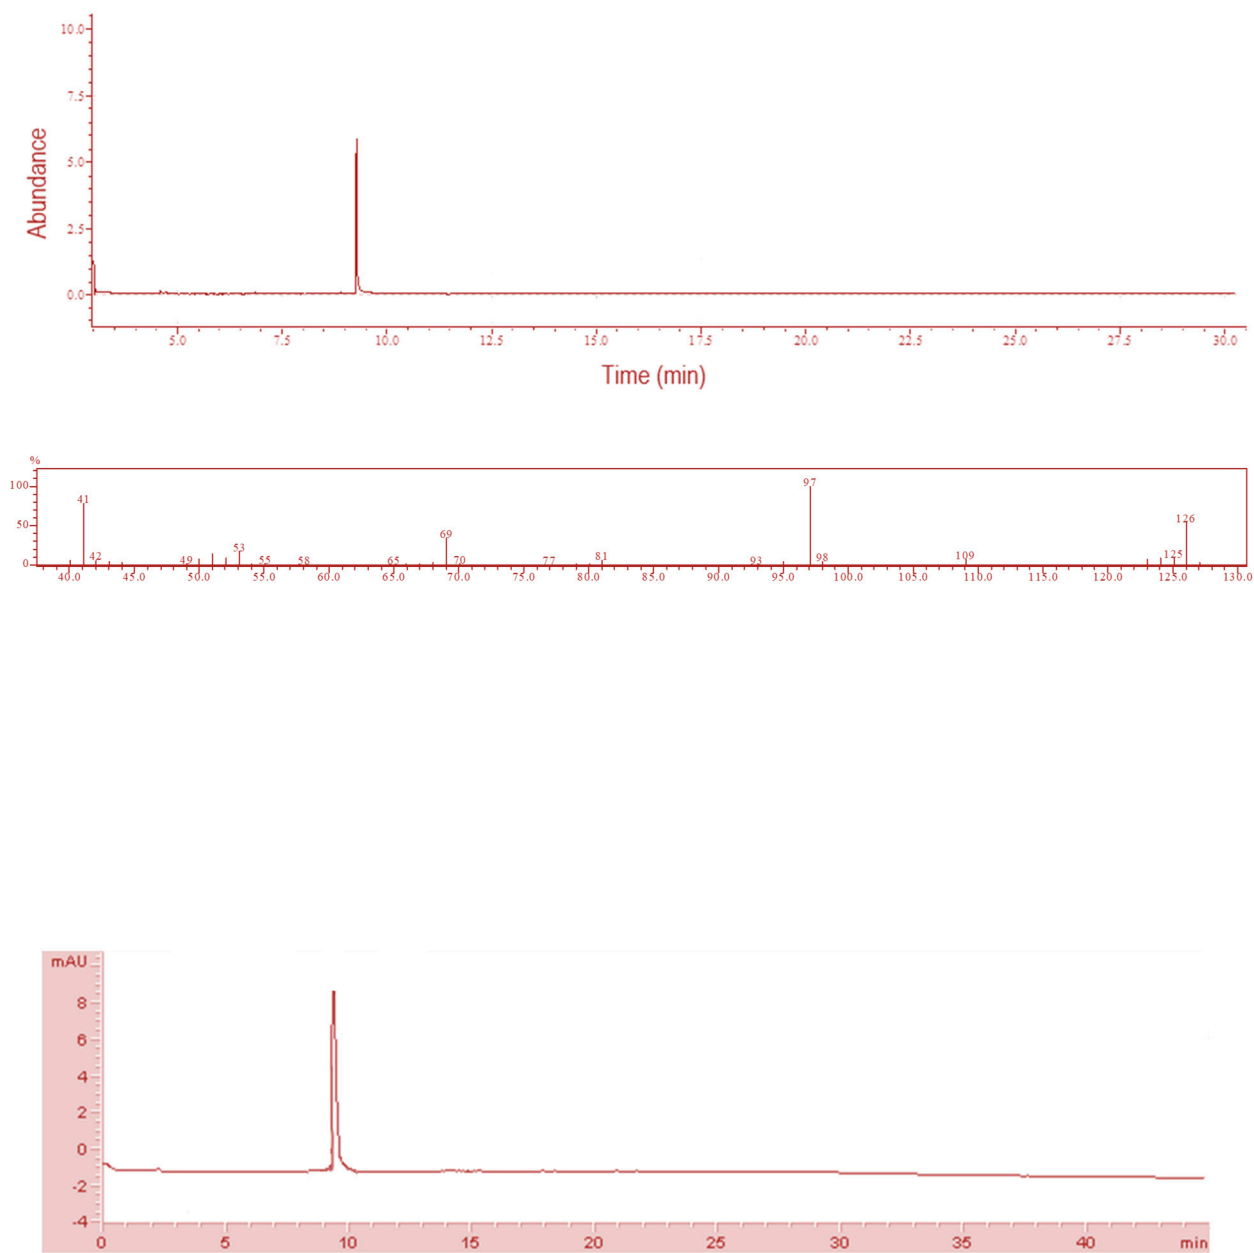

r.t. = 9.612

S5. GC-MS and HPLC of BHMF

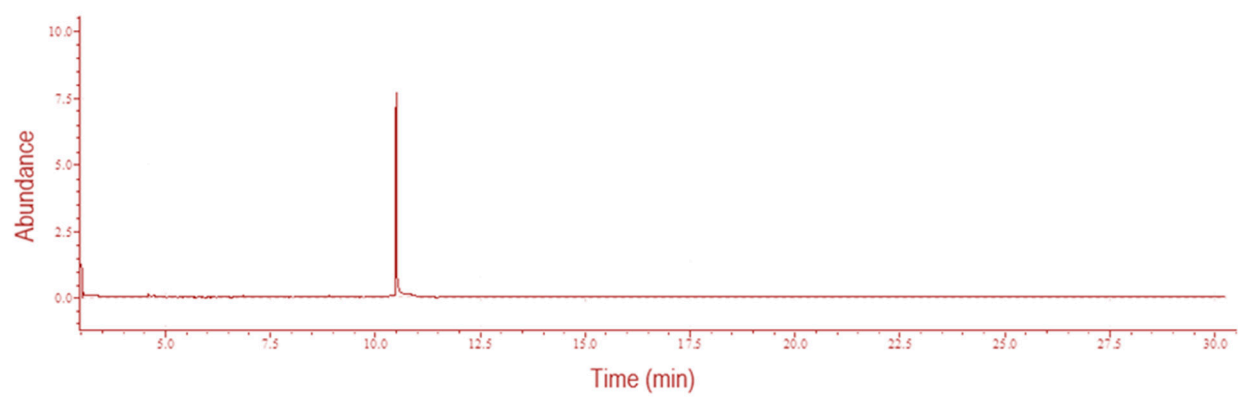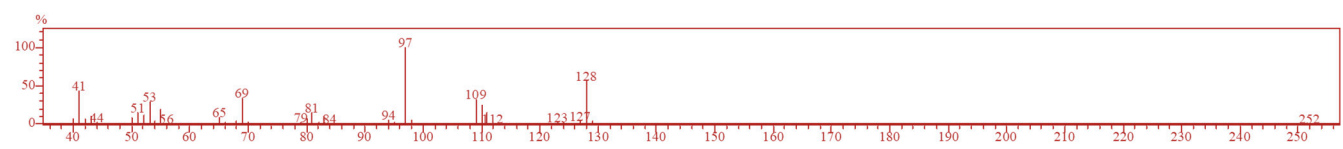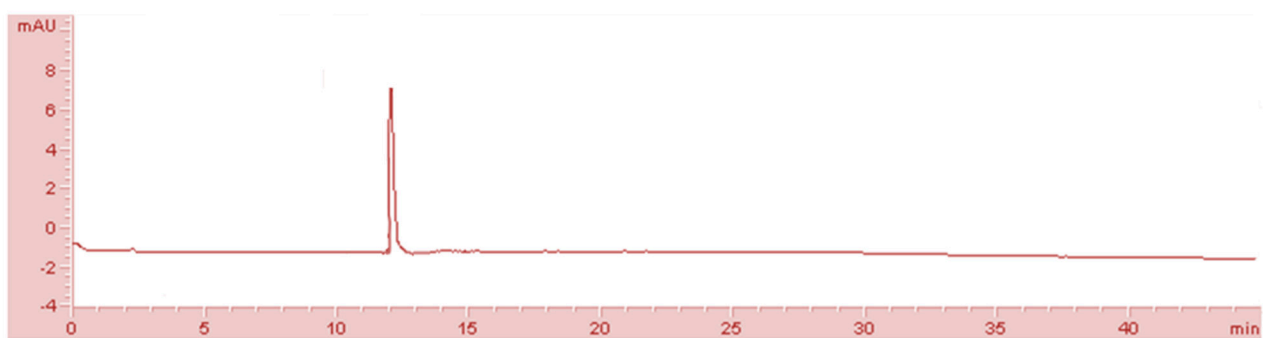



S6. GC-MS and HPLC of BHMf recovered after enzymatic hydrolysis

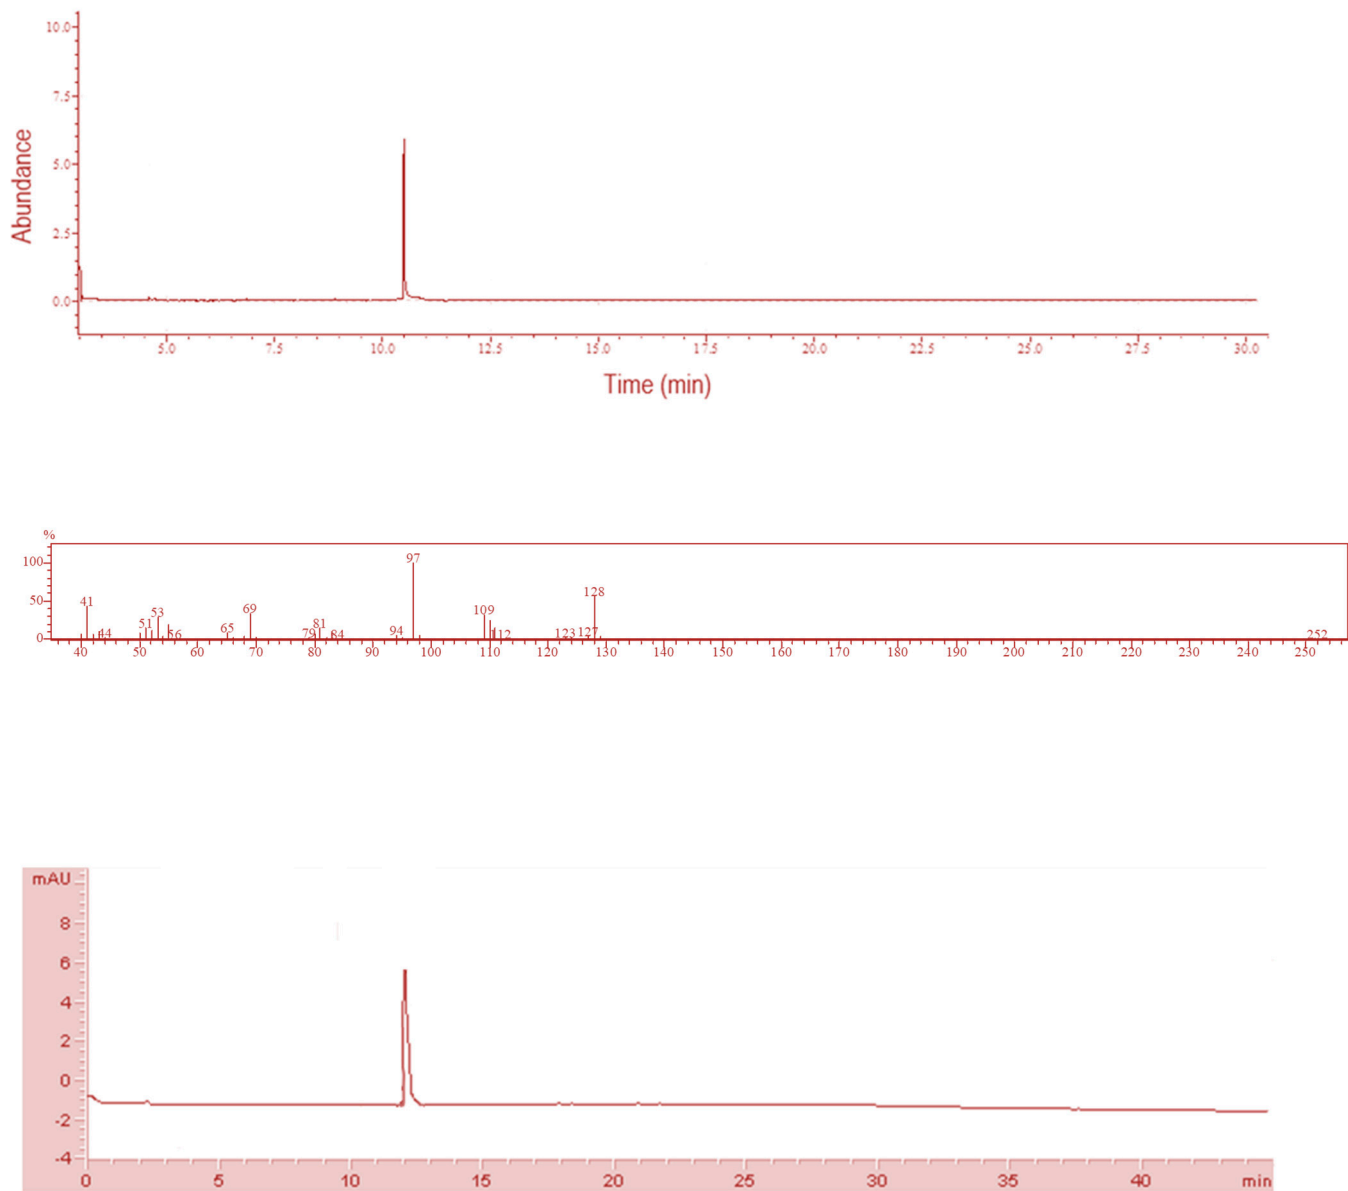

Supplement: s1 [file s1]
